# Supplementary material
Source: HighWire-hosted journal article supplement (https://bmjopen.bmj.com/content/15/3/e088828)
Supplement: inline-supplementary-material-3 [file inline-supplementary-material-3.pdf]

Appendix II: Data Extraction Instruments

Table 1: Evidence Source Details and Characteristics

|                                                                                             |  |
|---------------------------------------------------------------------------------------------|--|
| Citation details (e.g. author/s, year of publication, title, journal, volume, issue, pages) |  |
| Study design                                                                                |  |
| Country                                                                                     |  |
| Time period                                                                                 |  |
| Inclusion criteria                                                                          |  |
| Participants details (e.g. age, sex, ethnicity, race, disease type) and number enrolled     |  |
| Comparator information (if applicable)                                                      |  |
| Intervention description                                                                    |  |
| Number of institutions implementing this intervention                                       |  |

|                                                                  |  |
|------------------------------------------------------------------|--|
| Navigation to trials within their centre or outside their centre |  |
| Primary and secondary outcomes definitions and their results     |  |
| Navigator qualifications, certification, and training            |  |

**Table 2: Implementation Outcomes (based on RE-AIM) (Reach, Effectiveness, Adoption, Implementation, Maintenance)**

| Journal Citation                                            |                   | Worksite            | Medical Office | Community | School            | (circle) |
|-------------------------------------------------------------|-------------------|---------------------|----------------|-----------|-------------------|----------|
| (Author, Journal, Year, Page)                               |                   | PA                  | Smoking        | Nutrition | (circle relevant) |          |
| REACH                                                       | Reported (Yes/No) | Data                |                | Comments  |                   |          |
| Method to identify target population                        |                   |                     |                |           |                   |          |
| Inclusion criteria                                          |                   |                     |                |           |                   |          |
| Exclusion criteria                                          |                   |                     |                |           |                   |          |
| Sample size and participation rate                          |                   |                     |                |           |                   |          |
| Characteristics of both participation and non-participation |                   |                     |                |           |                   |          |
| EFFICACY /EFFECTIVENESS                                     | Design            | Conditions          |                |           |                   |          |
| Design/Conditions                                           |                   |                     |                |           |                   |          |
|                                                             | Reported          | Effect Size and Raw |                | P value   | Comments          |          |

|                                               |                          |                             |                 |  |
|-----------------------------------------------|--------------------------|-----------------------------|-----------------|--|
|                                               | (Yes/No)                 | Outcomes (where applicable) |                 |  |
| Measures/Results (at shortest assessment)     |                          |                             |                 |  |
| Intent to treat or present at FU (circle one) |                          |                             |                 |  |
| Imputation procedures (specify)               |                          |                             |                 |  |
| Quality of life measure                       |                          |                             |                 |  |
| Effects at longest (specify time)             |                          |                             |                 |  |
| Percent attrition                             |                          |                             |                 |  |
| <b>Adoption - Diffusion - Setting Level</b>   | <b>Reported (Yes/No)</b> | <b>Data</b>                 | <b>Comments</b> |  |
| Method to identify target delivery agent      |                          |                             |                 |  |
| Level of expertise of delivery agent          |                          |                             |                 |  |
| Inclusion/exclusion criteria                  |                          |                             |                 |  |
| Rate                                          |                          |                             |                 |  |
| Characteristics of adoption/non-adoption      |                          |                             |                 |  |
| Measures of cost                              |                          |                             |                 |  |
| <b>Implementation</b>                         | <b>Reported (Yes/No)</b> | <b>Data</b>                 | <b>Comments</b> |  |
| Intervention type and intensity               |                          |                             |                 |  |
| Extent protocol delivered as intended (%)     |                          |                             |                 |  |
| Measures of cost                              |                          |                             |                 |  |

| Maintenance                                                                                      | Reported (Yes/No) | Data | Comments           |
|--------------------------------------------------------------------------------------------------|-------------------|------|--------------------|
| Was individual behavior assessed at least 6 months following the completion of the intervention? |                   |      | Follow-up period = |
| Is the program still in place?                                                                   |                   |      | Follow-up period = |
| Was the program modified? Specify                                                                |                   |      | Follow-up period = |

**Table 3: PRISM (Practical Robust Implementation and Sustainability Model)**

| Domain                                                            | How well does the program currently align with....                     | Not aligned? Very aligned? (scale 1-6) | N/A? | Notes |
|-------------------------------------------------------------------|------------------------------------------------------------------------|----------------------------------------|------|-------|
| Program Characteristics from Patient/Community Member Perspective | ...expectations/perspectives of the PATIENTS and/or COMMUNITY MEMBERS? |                                        |      |       |
| Program Characteristics from Organizational Perspective           | ...expectations/perspectives of the ORGANIZATIONAL (setting) PARTNERS? |                                        |      |       |
| Patient/Community Recipient Characteristics                       | ...characteristics of the intended PATIENT and/or COMMUNITY MEMBERS?   |                                        |      |       |
| Organizational/ Recipient Characteristics                         | ...characteristics of the ORGANIZATIONAL PARTNERS                      |                                        |      |       |
| Implementation & Sustainability                                   | ...available resources, staff, workflow, responsibilities              |                                        |      |       |

|                      |                                                                                     |  |  |  |
|----------------------|-------------------------------------------------------------------------------------|--|--|--|
| Infrastructure       | and support functions to produce success?                                           |  |  |  |
| External Environment | ...characteristics of the EXTERNAL ENVIRONMENT (e.g., policies, guidelines, norms)? |  |  |  |

Table 4: TIDieR (Template for Intervention Description and Replication)

| Item number | Item                                                                                                                                                                                                                                                                                                               | Where located                           |                 |
|-------------|--------------------------------------------------------------------------------------------------------------------------------------------------------------------------------------------------------------------------------------------------------------------------------------------------------------------|-----------------------------------------|-----------------|
|             |                                                                                                                                                                                                                                                                                                                    | Primary paper (page or appendix number) | Other (details) |
| 1           | <b>BRIEF NAME</b><br>Provide the name or a phrase that describes the intervention                                                                                                                                                                                                                                  |                                         |                 |
| 2           | <b>WHY</b><br>Describe any rationale, theory, or goal of the elements essential to the intervention                                                                                                                                                                                                                |                                         |                 |
| 3           | <b>WHAT</b><br>Materials: describe any physical or informational materials used in the intervention, including those provided to participants or used in intervention delivery or in training of intervention providers<br>Provide information on where the materials can be accessed (e.g., online appendix, URL) |                                         |                 |
| 4           | <b>WHAT</b><br>Procedures: describe each of the procedures, activities, and/or                                                                                                                                                                                                                                     |                                         |                 |

|   |                                                                                                                                                                                                              |  |  |
|---|--------------------------------------------------------------------------------------------------------------------------------------------------------------------------------------------------------------|--|--|
|   | processes used in the intervention, including any enabling or support activities                                                                                                                             |  |  |
| 5 | <b>WHO PROVIDED</b><br>For each category of intervention provider (e.g., psychologist, nursing assistant), describe their expertise, background and any specific training given                              |  |  |
| 6 | <b>HOW</b><br>Describe the modes of delivery (e.g., face-to-face or by some other mechanism, such as internet or telephone) of the intervention and whether it was provided individually or in a group       |  |  |
| 7 | <b>WHERE</b><br>Describe the type(s) or location(s) where the intervention occurred, including any necessary infrastructure or relevant features                                                             |  |  |
| 8 | <b>WHEN AND HOW MUCH</b><br>Describe the number of times the intervention was delivered and over what period of time including the number of sessions, their schedule, and their duration, intensity or dose |  |  |
| 9 | <b>TAILORING</b><br>If the intervention was planned to be personalised, titrated or                                                                                                                          |  |  |

|    |                                                                                                                                                                                          |  |  |
|----|------------------------------------------------------------------------------------------------------------------------------------------------------------------------------------------|--|--|
|    | adapted, then describe what, why, when, and how                                                                                                                                          |  |  |
| 10 | <b>MODIFICATIONS</b><br>If the intervention was modified during the course of the study, describe the changes (what, why, when, and how)                                                 |  |  |
| 11 | <b>HOW WELL</b><br>Planned: if intervention adherence or fidelity was assessed, describe how and by whom, and if any strategies were used to maintain or improve fidelity, describe them |  |  |
| 12 | <b>HOW WELL</b><br>Actual: if intervention adherence or fidelity was assessed, describe the extent to which the intervention was delivered as planned                                    |  |  |
