# Supplementary material
Source: HighWire-hosted journal article supplement (https://bmjopen.bmj.com/content/15/3/e088828)
Supplement: inline-supplementary-material-4 [file inline-supplementary-material-4.pdf]

Appendix III: Codes for Deductive Content Analysis

Table 1: COMET (Core Outcome Measures in Effectiveness Trials)

| Core Area                 | Williamson/Clarke (Initial)                              |
|---------------------------|----------------------------------------------------------|
| Death                     | Mortality/survival                                       |
|                           | Physiological/clinical                                   |
| Physiological or clinical | Infection                                                |
| Life impact               | Pain                                                     |
|                           | Function (physical, social, role)                        |
|                           | Psychosocial                                             |
|                           | Mental health                                            |
|                           | HRQL                                                     |
|                           | Compliance (including withdrawal from treatment)         |
|                           | Satisfaction                                             |
| Resource use              | Resource use (economic, hospital, operative, medication) |
| Adverse events            | Adverse events/effects                                   |

Table 2: Key Domains of Patient Navigation Care and Intervention Components according to Chan et al.

| Domain            | Patient Navigation Intervention Components                                                                                                                                        |
|-------------------|-----------------------------------------------------------------------------------------------------------------------------------------------------------------------------------|
| Care coordination | <ul style="list-style-type: none"><li>- Coming up with individualized plans (e.g., action plans, return-to-work plans)</li><li>- Reminders to patients and/or providers</li></ul> |

|                                 |                                                                                                                                                                                                                                                                                                                                                                                                                                                                                                                                                                                                                                                                                                                                                                                                                                                                                                |
|---------------------------------|------------------------------------------------------------------------------------------------------------------------------------------------------------------------------------------------------------------------------------------------------------------------------------------------------------------------------------------------------------------------------------------------------------------------------------------------------------------------------------------------------------------------------------------------------------------------------------------------------------------------------------------------------------------------------------------------------------------------------------------------------------------------------------------------------------------------------------------------------------------------------------------------|
|                                 | <ul style="list-style-type: none"> <li>- Ensuring availability of medical records</li> <li>- Scheduling and arranging appointments</li> <li>- Facilitating linkages and/or providing referrals to follow-up services and support</li> <li>- Liaising/communicating with health care providers</li> <li>- Serving as primary contact person or reference of care</li> <li>- Providing a link between acute and community services</li> <li>- Assisting transitions across settings and providers</li> <li>- Monitoring and/or following up with patients</li> </ul>                                                                                                                                                                                                                                                                                                                             |
| Education/information provision | <ul style="list-style-type: none"> <li>- Education (including one-on-one or group education)</li> <li>- Information provision (which may also be tailored, include use of decision aids, involve clarifying doubts/providing explanations, or include information about available services and resources or test instructions)</li> <li>- Providing take-home learning materials</li> <li>- Use of media campaign or materials</li> </ul>                                                                                                                                                                                                                                                                                                                                                                                                                                                      |
| Empowerment                     | <ul style="list-style-type: none"> <li>- Problem solving with individuals (e.g., physical, psychological, and social issues)</li> <li>- Encouragement/motivation (e.g., using strengths-based approach or video testimonials)</li> <li>- Guidance (e.g., guiding patients to identify concerns/preferences, guidance in administering self-test, guidance on treatment and diagnostic tests)</li> <li>- Communication coaching (to facilitate communication between patients and health care providers)</li> <li>- Counselling (e.g., psychosocial, medical, or barriers counselling, motivational interviewing)</li> <li>- Promoting self-care (e.g., home-based exercise and relaxation)</li> <li>- Assisting in self-management (e.g., psychosocial stress management, symptom management)</li> <li>- Self-help group support</li> <li>- Caregiver support or family counselling</li> </ul> |

|                           |                                                                                                                                                                                                                                                                                                                                                                                                                                                                                                                                                                                                                                                |
|---------------------------|------------------------------------------------------------------------------------------------------------------------------------------------------------------------------------------------------------------------------------------------------------------------------------------------------------------------------------------------------------------------------------------------------------------------------------------------------------------------------------------------------------------------------------------------------------------------------------------------------------------------------------------------|
|                           | <ul style="list-style-type: none"> <li>- Fostering social interactions</li> <li>- Peer modelling (e.g., via survivor narratives)</li> <li>- Skills training/building</li> </ul>                                                                                                                                                                                                                                                                                                                                                                                                                                                                |
| Comfort/emotional support | <ul style="list-style-type: none"> <li>- Emotional, social, or psychosocial support (e.g., accompanying patients during appointments, providing practical advice or coping strategies, or providing an avenue for patients to get help or advice)</li> <li>- Providing culturally safe environment</li> <li>- Ensuring female physicians are available</li> <li>- Spiritual support</li> </ul>                                                                                                                                                                                                                                                 |
| Direct care provision     | <ul style="list-style-type: none"> <li>- Provision of direct nursing care/services</li> <li>- Symptom management</li> </ul>                                                                                                                                                                                                                                                                                                                                                                                                                                                                                                                    |
| Advocacy                  | <ul style="list-style-type: none"> <li>- Advocacy</li> </ul>                                                                                                                                                                                                                                                                                                                                                                                                                                                                                                                                                                                   |
| Language assistance       | <ul style="list-style-type: none"> <li>- Translation services and assistance</li> </ul>                                                                                                                                                                                                                                                                                                                                                                                                                                                                                                                                                        |
| Logistics assistance      | <ul style="list-style-type: none"> <li>- Outreach</li> <li>- Sending out invitations for screening</li> <li>- Providing direct access to screening tests (e.g., mailing of screening kits, navigators performing the screening themselves)</li> <li>- Transportation services and assistance</li> <li>- Modifying service hours</li> <li>- Offering services in residential communities</li> <li>- Offering mobile screening services (e.g., mammography vans at worksites)</li> <li>- Assisting in eldercare and/or childcare arrangements</li> <li>- Providing tours of the clinics</li> <li>- Assisting in obtaining medications</li> </ul> |
| Financial assistance      | <ul style="list-style-type: none"> <li>- Subsidizing costs for transportation</li> <li>- Providing assistance with financial and health insurance</li> <li>- Assisting in completing paperwork and/or making financial applications</li> <li>- Reducing out-of-pocket costs using vouchers and reimbursements</li> <li>- Assisting in sourcing for low-cost sources of care</li> <li>- Offering free or subsidized screening services</li> </ul>                                                                                                                                                                                               |

|  |                                               |
|--|-----------------------------------------------|
|  | - Offering financial incentives for screening |
|--|-----------------------------------------------|
